# Supplementary material
Source: PubMed Central journal article supplement (PMC4036349)
Supplement: supp_M113.530535_jbc.M113.530535-1.pdf [file supp_M113.530535_jbc.M113.530535-1.pdf]

Molecular mechanism of substrate specificity for heparan sulfate 2-O-  
sulfotransferase

***Supplementary Information***

Chunhui Liu<sup>1,3</sup>, Juzheng Sheng<sup>1,3</sup>, Juno M. Krahn<sup>2</sup>, Lalith Perera<sup>2</sup>, Yongmei Xu<sup>1</sup>, Po-  
Hung Hsieh<sup>1</sup>, Jian Liu<sup>1,\*</sup> and Lars C. Pedersen<sup>2</sup>

1. Division of Chemical Biology and Medicinal Chemistry, Eshelman School of Pharmacy, University of North Carolina, Chapel Hill, NC 27599
2. Laboratory of Structural Biology, National Institute of Environmental Health Sciences, National Institutes of Health, Research Triangle Park, NC, 27709
3. Institute of Biochemical and Biotechnological Drug, School of Pharmaceutical Sciences, Shandong University, Jinan 250012, China

**Running title:** Crystal of ternary complex of 2OST

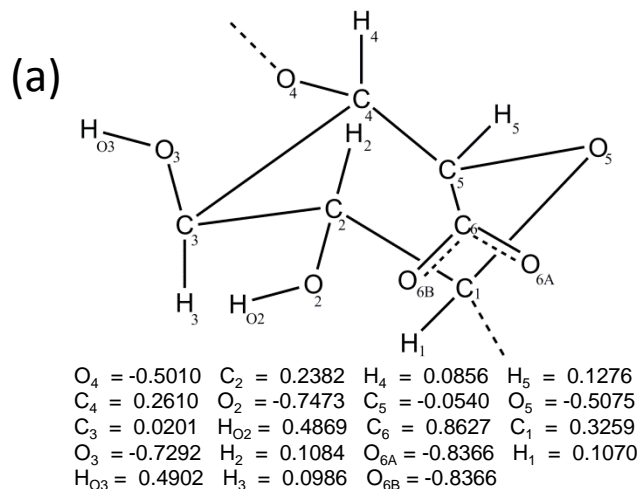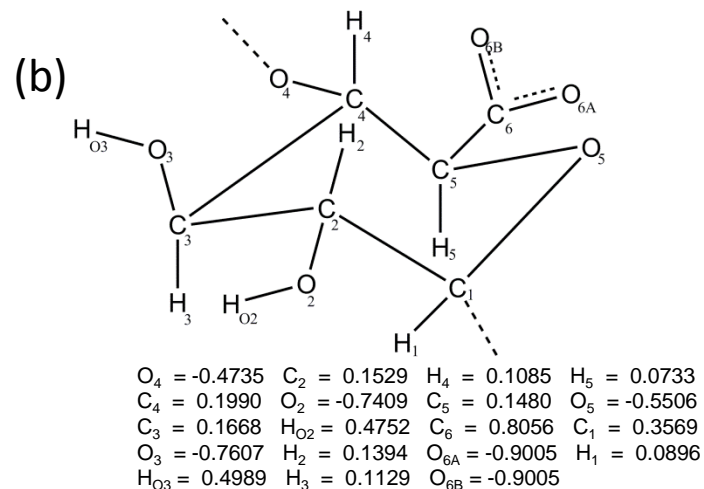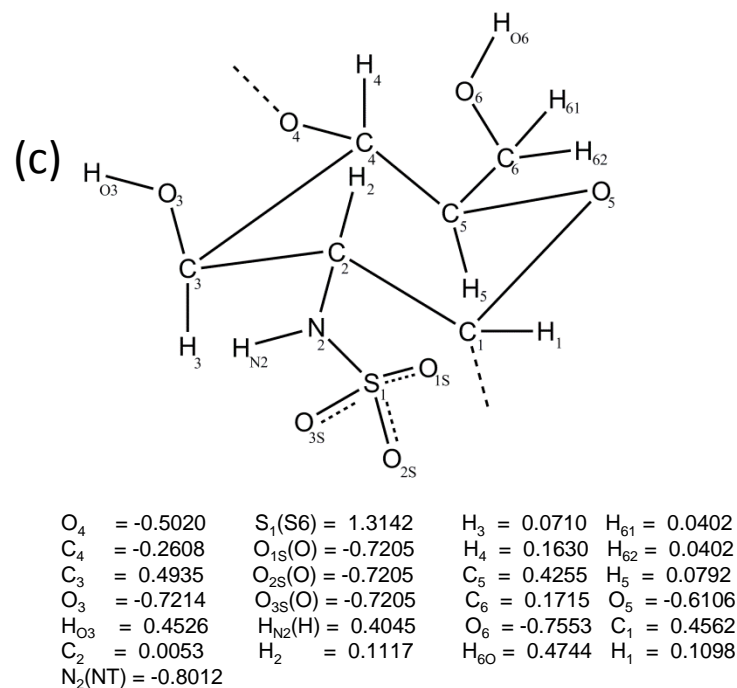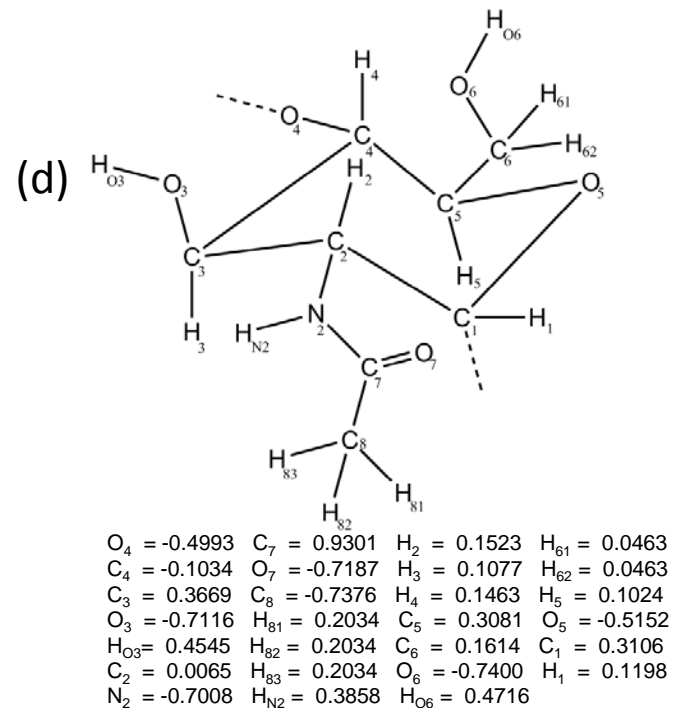

**Supplemental Figure 1.** Amber charges are given in (a) IdoA, (b) GlcA (c) GlcNS (d) GlcNAc, and (e) pnp. Amber atom types are indicated for non-standard atoms in parenthesis. Other relevant non-standard amber parameters are given in (f).

(e)

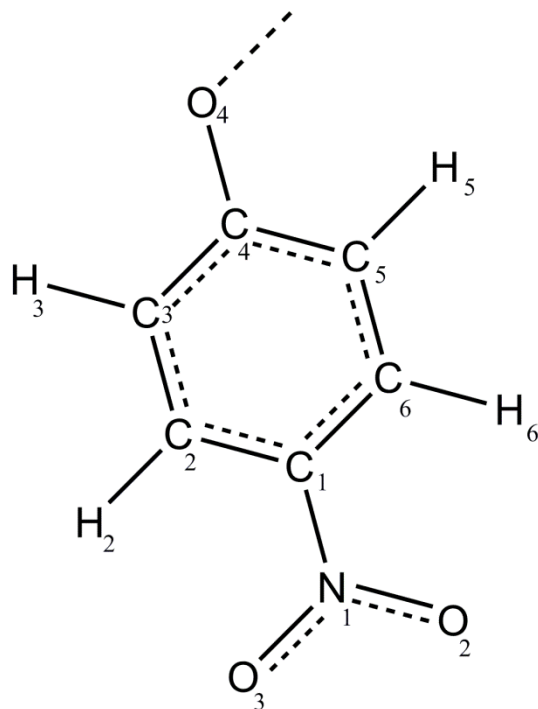

|           |             |       |             |       |             |       |             |
|-----------|-------------|-------|-------------|-------|-------------|-------|-------------|
| $C_1$     | $= 0.0946$  | $C_2$ | $= -0.1654$ | $C_4$ | $= 0.4776$  | $H_5$ | $= 0.1971$  |
| $N_1(NO)$ | $= 0.7297$  | $H_2$ | $= 0.2042$  | $O_4$ | $= -0.5051$ | $C_6$ | $= -0.1654$ |
| $O_2(O)$  | $= -0.4869$ | $C_3$ | $= -0.1473$ | $C_5$ | $= -0.1473$ | $H_6$ | $= 0.2042$  |
| $O_3(O)$  | $= -0.4869$ | $H_3$ | $= 0.1971$  |       |             |       |             |

(f)

### Non-standard amber parameters used in the present study.

#### Mass

|    |       |
|----|-------|
| S6 | 32.06 |
| NO | 14.01 |

| Bond  | $K_R$ | Req   |
|-------|-------|-------|
| NT-S6 | 300.0 | 1.696 |
| S6-O  | 300.0 | 1.470 |
| CA-NO | 337.0 | 1.460 |
| O-NO  | 337.0 | 1.220 |

| Angle    | $\theta$ | $\theta_{eq}$ |
|----------|----------|---------------|
| CT-OH-CA | 50.0     | 116.90        |
| CT-OH-CT | 50.0     | 116.90        |
| H2-CT-OH | 50.0     | 110.90        |
| OS-CT-OH | 160.0    | 110.00        |
| CA-NO-O  | 50.0     | 118.30        |
| O-NO-O   | 50.0     | 123.40        |
| NO-CA-CA | 63.0     | 119.30        |
| CT-NT-S6 | 100.0    | 116.60        |
| NT-S6-O  | 50.0     | 105.20        |
| S6-NT-H  | 50.0     | 107.30        |
| O-S6-O   | 50.0     | 113.40        |

| Dihedral    | div | Vn/2 | $\gamma$ | n   |
|-------------|-----|------|----------|-----|
| X-S6-NT-X   | 6   | 1.80 | 0.0      | 3.  |
| O-NO-CA-CA  | 1   | 2.50 | 180.0    | -2. |
| O-NO-CA-CA  | 1   | 2.00 | 0.0      | 1.  |
| NO-CA-CA-HA | 1   | 2.50 | 180.0    | -2. |
| NO-CA-CA-HA | 1   | 2.00 | 0.0      | 1.  |

| Improper | Vn/2 | $\gamma$ | n  |
|----------|------|----------|----|
| X-X-NO-O | 1.1  | 180.     | 2. |

| Non-bonded | $R^*$  | $\epsilon$ |
|------------|--------|------------|
| S6         | 2.0000 | 0.2500     |
| NO         | 1.8240 | 0.1700     |

Supplemental Figure 1. continued.
